# Supplementary material for: Synthesis of magnetic NiFe2O4/g-C3N4 heterojunction photocatalysts for boosting dye degradation performance under visible-light irradiation
Source: Royal Society of Chemistry journal article supplement (doi:10.1039/d4na00694a), 2024-12-05
Supplement: d4na00694a1.pdf [file d4na00694a1.pdf]

## Supplementary Material

### Synthesis of magnetic NiFe<sub>2</sub>O<sub>4</sub>/g-C<sub>3</sub>N<sub>4</sub> heterojunction photocatalysts for boosting dye degradation performance under visible-light irradiation

Loan Thi To Nguyen,<sup>1</sup> Anh Thi Tu Duong,<sup>1</sup> Nguyen Duc Bui,<sup>1</sup> Viet Thi Mai Ngo,<sup>1</sup> Hai Quang Nguyen,<sup>1</sup> Hang Thi Thuy Nguyen,<sup>2</sup> Giang Thanh Tran,<sup>3</sup> Thuan Van Tran<sup>3,\*</sup>

<sup>1</sup> Faculty of Chemistry, Thai Nguyen University of Education, Thai Nguyen 240000, Vietnam.

<sup>2</sup> Faculty of Automotive and Power Machinery Engineering, Thai Nguyen University of Technology, Thai Nguyen 24000, Vietnam

<sup>3</sup> Institute of Applied Technology and Sustainable Development, Nguyen Tat Thanh University, 298-300A Nguyen Tat Thanh, District 4, Ho Chi Minh City 755414, Vietnam.

#### Correspondence

\* To whom correspondence should be addressed: Thuan Van Tran (Email: [tranvt@ntt.edu.vn](mailto:tranvt@ntt.edu.vn), [tranuv@gmail.com](mailto:tranuv@gmail.com)).

Nguyen Tat Thanh University, 298-300A Nguyen Tat Thanh, District 4, Ho Chi Minh City 755414, Vietnam.

Tel: (+84)-028-3941-1211, Fax: (+84)-028-39-404-759.

**Table S1.** Several physicochemical properties of g-C<sub>3</sub>N<sub>4</sub>, NiFe<sub>2</sub>O<sub>4</sub>, and CNF<sub>x</sub> (x = 10, 20, 30)

| Material                              | g-C <sub>3</sub> N <sub>4</sub> | NiFe <sub>2</sub> O <sub>4</sub> | CNF10 | CNF20 | CNF30 |
|---------------------------------------|---------------------------------|----------------------------------|-------|-------|-------|
| Saturation magnetization (Ms) (emu/g) | -                               | 32.9                             | 6.5   | 18.4  | 28.1  |
| Coercivity (Hc) (Oe)                  | -                               | 122.5                            | 166.3 | 166.1 | 151.0 |
| Remnant magnetization (Mr) (emu/g)    | -                               | 4.8                              | 1.0   | 2.2   | 2.6   |
| BET surface area (m <sup>2</sup> /g)  | 48.5                            | 23.2                             | -     | -     | 62.3  |
| Pore volume (cm <sup>3</sup> /g)      | 0.30                            | 0.13                             | -     | -     | 0.43  |
| Pore size (nm)                        | 30.7                            | 22.3                             | -     | -     | 31.8  |

**Table S2.** Kinetic data of photocatalytic degradation of RhB

| Sample                              | g-C <sub>3</sub> N <sub>4</sub> | NiFe <sub>2</sub> O <sub>4</sub> | CNF10 | CNF20 | CNF30 | CNF50 |
|-------------------------------------|---------------------------------|----------------------------------|-------|-------|-------|-------|
| k <sub>1</sub> (min <sup>-1</sup> ) | 0.010                           | 0.006                            | 0.036 | 0.040 | 0.045 | 0.029 |
| (R <sub>adj.</sub> ) <sup>2</sup>   | 0.94                            | 0.93                             | 0.95  | 0.94  | 0.96  | 0.98  |
| H(%)                                | 60.6                            | 42.2                             | 95.2  | 96.8  | 97.9  | 91.9  |

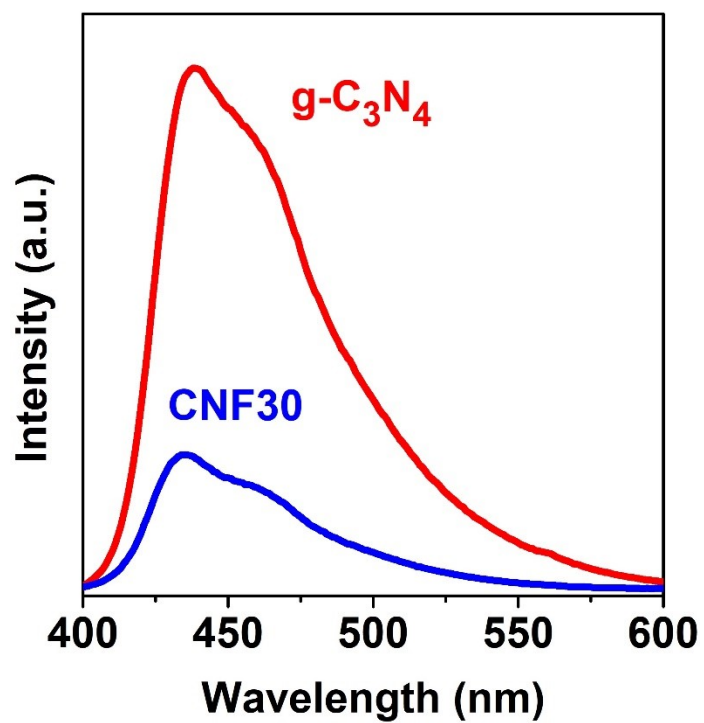

**Fig. S1.** The photoluminescence spectra of g-C<sub>3</sub>N<sub>4</sub> and CNF30

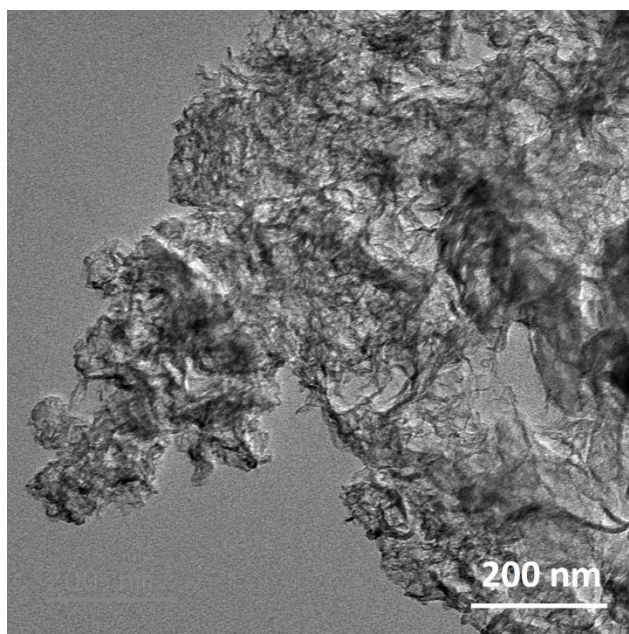

**Fig. S2.** TEM image of g-C<sub>3</sub>N<sub>4</sub>

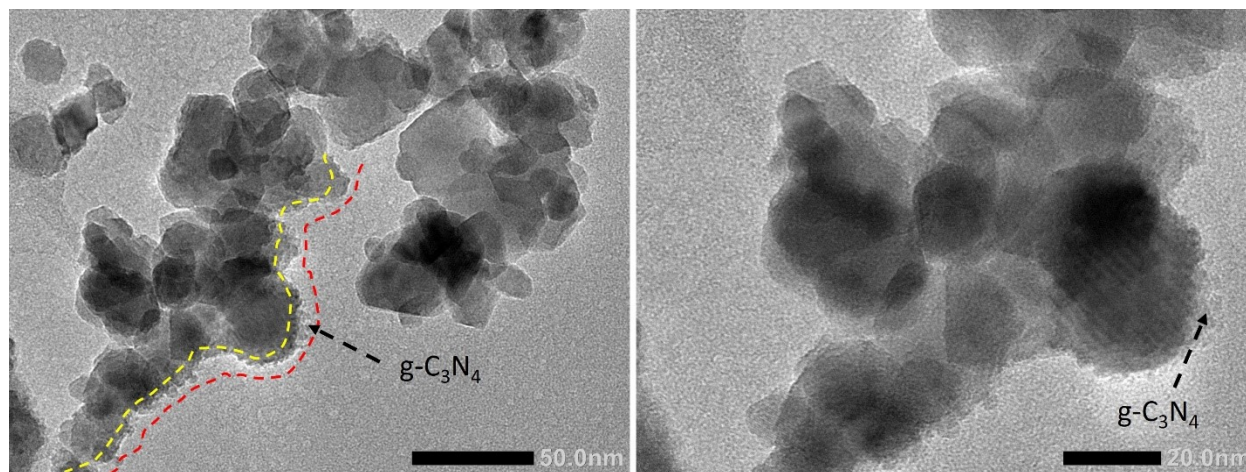

Fig. S3. TEM images of CNF30 at 50 nm (left side) and 20 nm (right side) scale

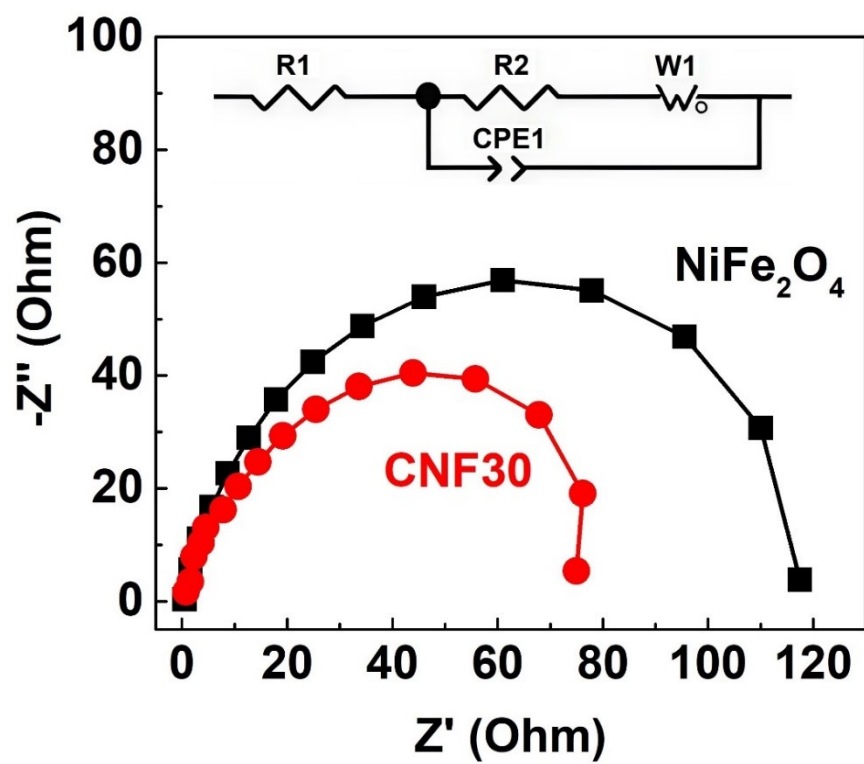

Fig. S4. EIS Nyquist impedance plots of NiFe<sub>2</sub>O<sub>4</sub> and CNF30

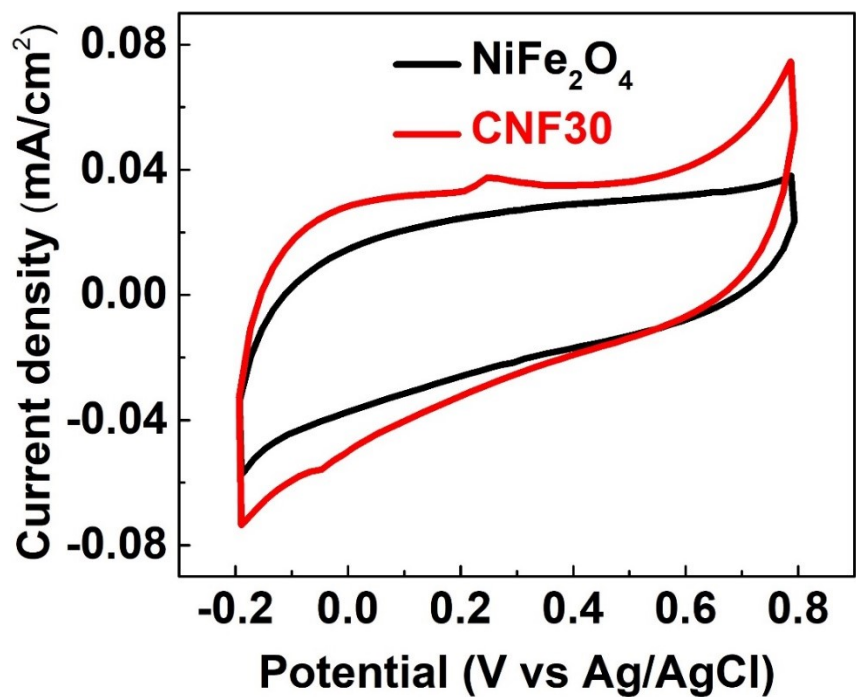

Fig. S5. The cyclic voltammetric curves of  $\text{NiFe}_2\text{O}_4$  and CNF30 at a scan rate of 50 mV/s

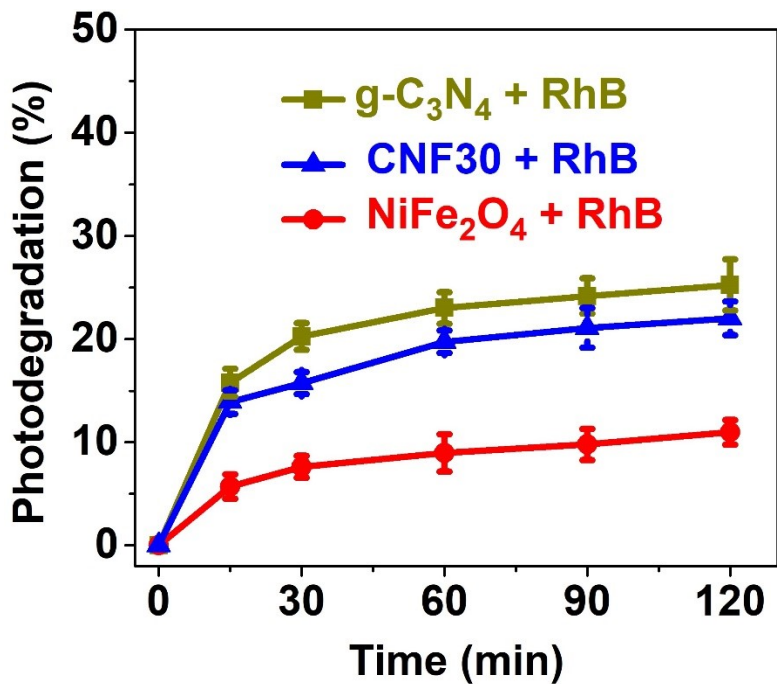

Fig. S6. Photocatalytic degradation of RhB without  $\text{H}_2\text{O}_2$  addition in the presence of visible light

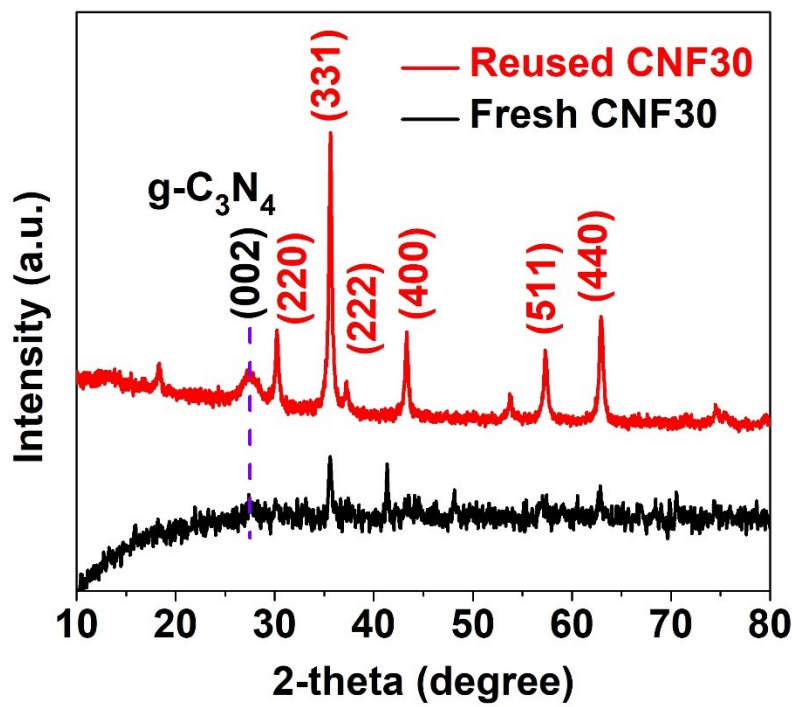

Fig. S7. The XRD pattern profiles of fresh and reused CNF30
